# Supplementary material for: Development of low-temperature SnO 2 –Au gas sensors for H 2 S detection in food freshness monitoring
Source: Royal Society of Chemistry journal article supplement (doi:10.1039/d4tc02901a), 2024-01-01
Supplement: d4tc02901a1.pdf [file d4tc02901a1.pdf]

**Supplementary Information**  
**for**  
**Development of Low-Temperature SnO<sub>2</sub>-Au Gas Sensors for H<sub>2</sub>S Detection**  
**in Food Freshness Monitoring**

Kee-Ryung Park<sup>1,2</sup>, Jinhyeong Kwon<sup>1,3\*</sup>, Hyeunseok Choi<sup>1\*</sup>

<sup>1</sup> Research Institute of Sustainable Development Technology, Korea Institute of Industrial Technology (KITECH), Cheonan, 31056, Republic of Korea

<sup>2</sup> Korea National Institute of Rare Metal, Korea Institute of Industrial Technology (KITECH), Incheon, 21655, Republic of Korea

<sup>3</sup> Laser-processed Nanomaterials Engineering Lab., Korea Institute of Industrial Technology (KITECH), Cheonan, 31056, Republic of Korea

\* Correspondence to

Dr. Jinhyeong Kwon (jhs0909k@kitech.re.kr)

Dr. Hyeunseok Choi (hchoi@kitech.re.kr)

\* None of the material has been published or is under consideration elsewhere, including the Internet.

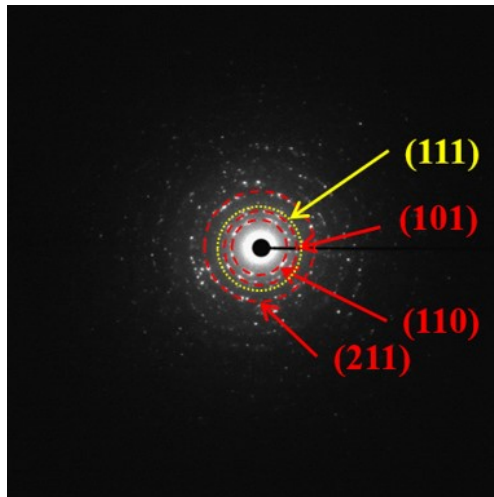

**Supplementary Figure 1.** SAED analysis result of the SnO<sub>2</sub>-Au 0.5 wt% hollow nanofiber. Ring patterns are observed, indicating (101), (110), and (211) planes for the SnO<sub>2</sub> and a (111) plane for Au.

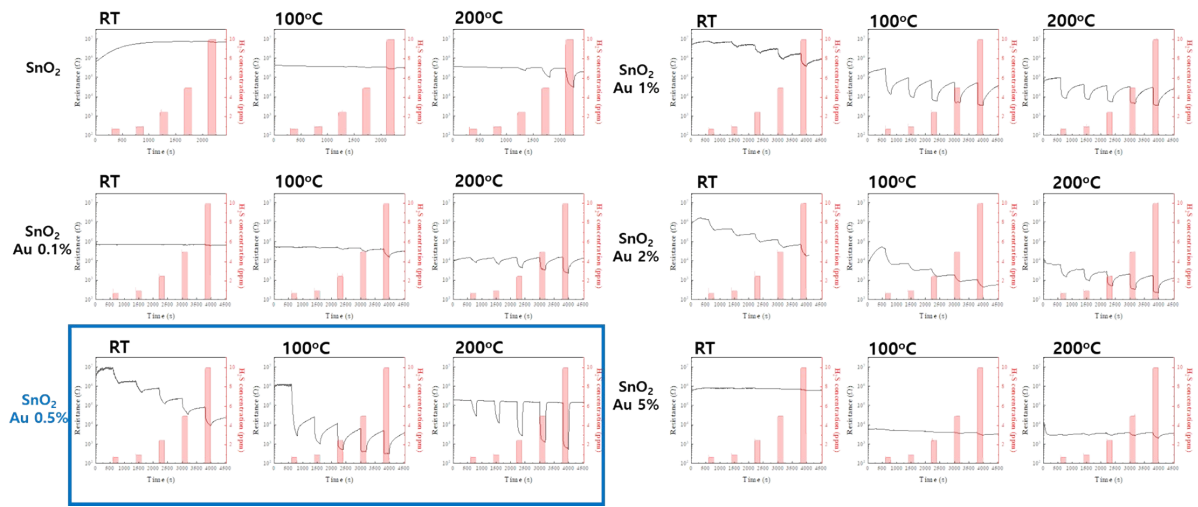

**Supplementary Figure 2.** Gas sensing characteristics of SnO<sub>2</sub>-Au hollow nanostructures with different Au contents ratios of 0, 0.1, 0.5, 1, 2, and 5 wt% to H<sub>2</sub>S gas in the range from 500 ppb to 10 ppm at different operating temperature from room temperature to 200°C.

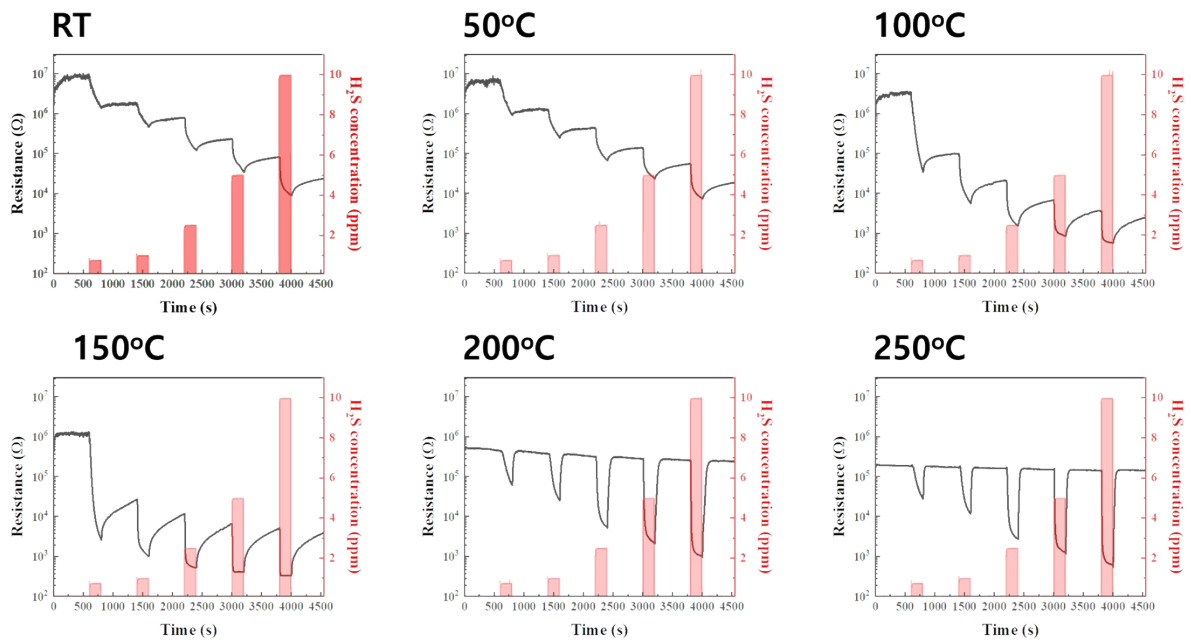

**Supplementary Figure 3.** Detailed gas sensing characteristics of SnO<sub>2</sub>-Au 0.5wt% gas sensor to H<sub>2</sub>S gas in the range from 500 ppb to 10 ppm with different operating temperature from room temperature to 250°C.

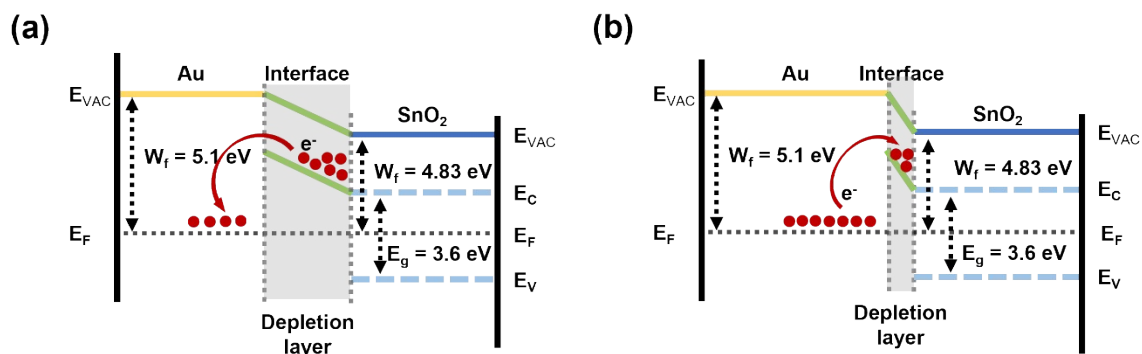

**Supplementary Figure 4.** Band diagram of the SnO<sub>2</sub>-Au 0.5 wt% gas sensor at 200°C in (a) air and (b) H<sub>2</sub>S environment.

The enhancement of gas sensing performance after adding 0.5wt% Au to SnO<sub>2</sub> can be attributed to two main mechanisms: electronic sensitization and chemical sensitization.<sup>1</sup> During the electronic sensitization process, carrier transfer occurs between the Au nanoparticles and SnO<sub>2</sub> due to the mismatch in work functions, leading to the formation of potential barriers. As illustrated in **Supplementary Figure 4(a)**, because Au has a higher work function, electrons generated during the sensing process migrate from the conduction band of SnO<sub>2</sub> into the Au until the Fermi levels equalize.<sup>2-4</sup> This transfer results in the formation of a Schottky barrier and an increase in the thickness of the electron depletion layer, which can suppress the recombination of separated electron-hole pairs and induce a significant change in resistance when exposed to target gases, thereby leading to a much higher response. Meanwhile, during the chemical sensitization process, the Au could facilitate the dissociation of oxygen molecules to produce more reactive chemisorbed oxygen ions which then spill over the surface of SnO<sub>2</sub> to react with more target gas molecules.<sup>5-7</sup> Thus, the chemical sensitization is also known as the spillover effect. As exhibited in **Supplementary Figure 4(b)**, oxygen molecules will preferentially adsorb on the Au metal nanoparticles and then be dissociated into O<sup>-</sup> which then spill over to the surface of SnO<sub>2</sub>. Taking the reducing gas as an example, the large amount of

$O^-$  could react with more target (reducing) gas molecules and cause the release of electrons, resulting in the rapid resistance change and thus the significant improvement of the gas sensing performance.

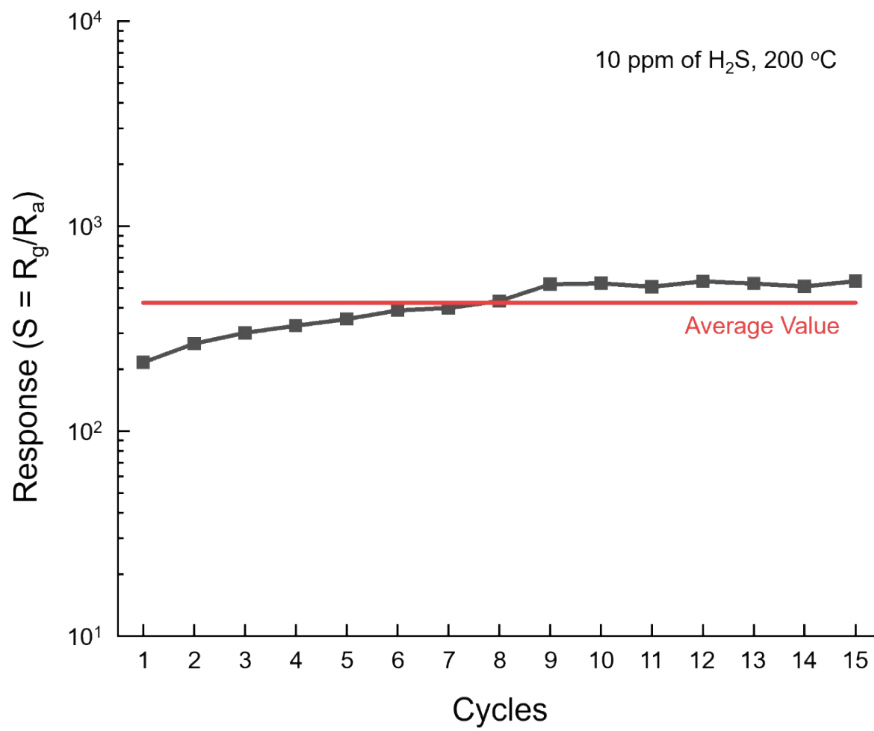

**Supplementary Figure 5.** Sensitivity stability over 15 cycles of H<sub>2</sub>S measurement tests at 10 ppm H<sub>2</sub>S and 200°C using the SnO<sub>2</sub>-Au 0.5 wt% gas sensor.

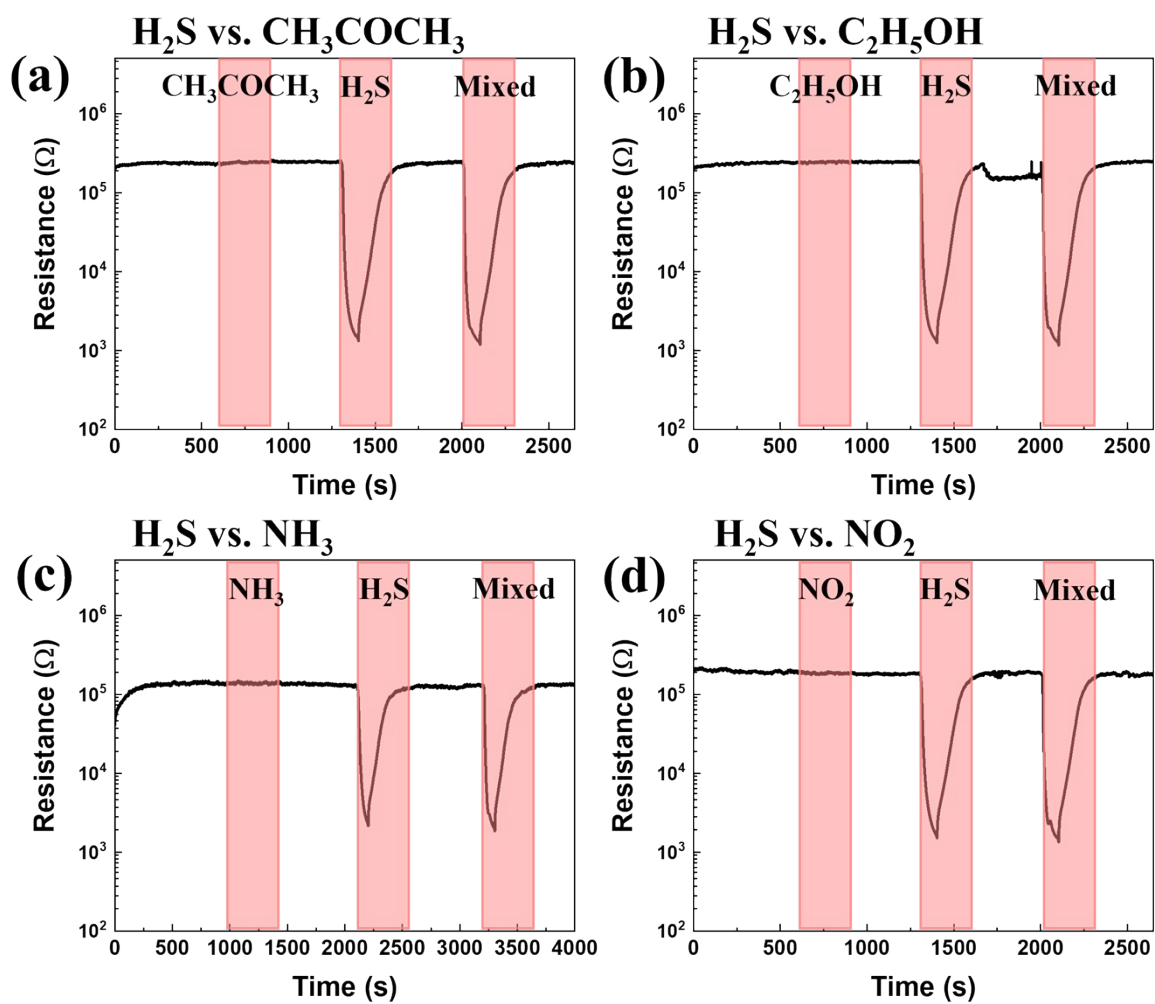

**Supplementary Figure 6.** Mixed gas sensing performance of the SnO<sub>2</sub>-Au 0.5 wt% gas sensor by fixing the H<sub>2</sub>S (10 ppm) gas with each gas as CH<sub>3</sub>COCH<sub>3</sub> (50 ppm), C<sub>2</sub>H<sub>5</sub>OH (50 ppm), NH<sub>3</sub> (200 ppm), and NO<sub>2</sub> (20 ppm).



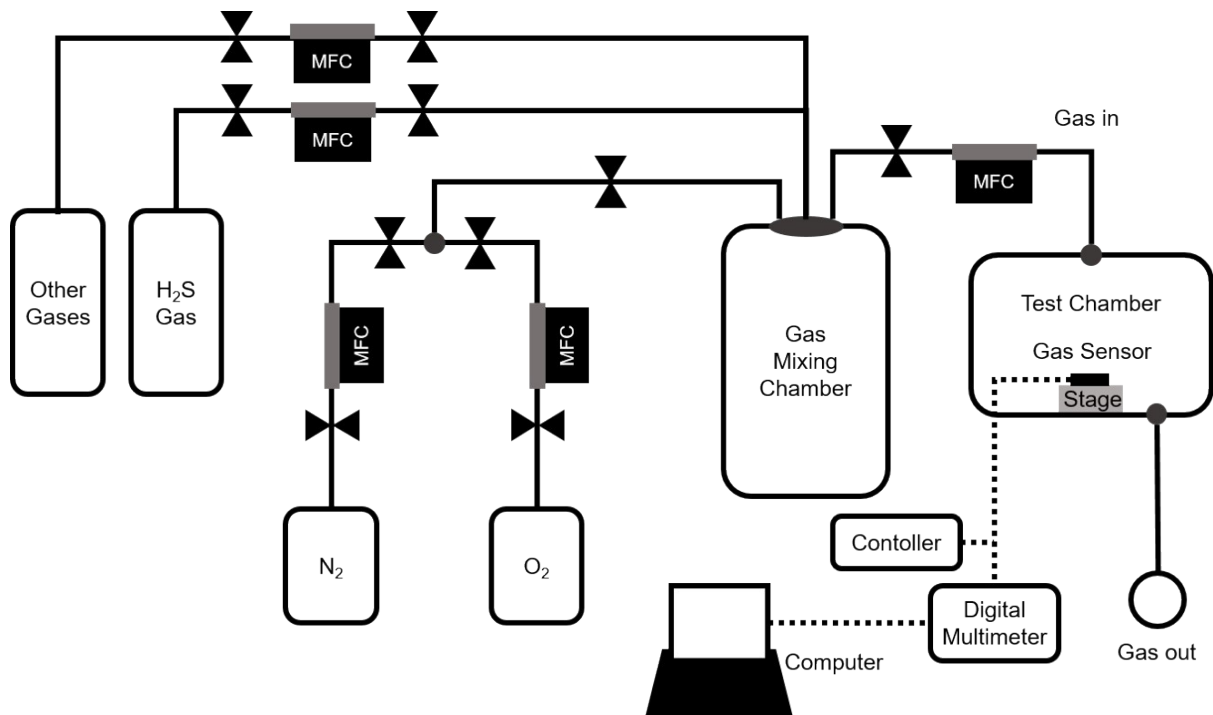

**Supplementary Figure 7.** Schematic of the gas sensing systems.

| <b>Materials</b>                           | <b>H<sub>2</sub>S Concentration (ppm)</b> | <b>Operation Temperature (°C)</b> | <b>Response (R<sub>a</sub>/R<sub>g</sub>)</b>                 | <b>References</b> |
|--------------------------------------------|-------------------------------------------|-----------------------------------|---------------------------------------------------------------|-------------------|
| Pt-SnO <sub>2</sub> hollow spheres         | 1                                         | 250                               | 10.8                                                          | [8]               |
| ZnO-SnO <sub>2</sub> nanospheres           | 10                                        | 300                               | 99.6                                                          | [9]               |
| Ag doped-SnO <sub>2</sub> films            | 450                                       | 100                               | 1.38                                                          | [10]              |
| Au/SnO-SnO <sub>2</sub> nanosheets         | 100                                       | 240                               | 82.27%<br>((R <sub>g</sub> -R <sub>a</sub> )/R <sub>a</sub> ) | [11]              |
| SnO <sub>2</sub> -NiO nanostructures       | 20                                        | 60                                | 250                                                           | [12]              |
| SnO <sub>2</sub> -Au hollow nanostructures | 10                                        | 200                               | 270.231                                                       | <b>This work</b>  |

**Table 1.** Performance comparison data of the SnO<sub>2</sub>-based H<sub>2</sub>S gas sensors.

## References

- [1] L. Zhu, et al., “Advances in Noble Metal-Decorated Metal Oxide Nanomaterials for Chemiresistive Gas Sensors: Overview”, *Nano-Micro Letters*, 15, 89, 2023.
- [2] J. Lee, et al., “High-performance gas sensor array for indoor air quality monitoring: the role of Au nanoparticles on WO<sub>3</sub>, SnO<sub>2</sub>, and NiO-based gas sensors”, *Journal of Material Chemistry A*, 9, 1159–1167, 2021.
- [3] W. Koo, et al., “Heterogeneous sensitization of metal-organic framework driven metal@metal oxide complex catalysts on an oxide nanofiber scaffold toward superior gas sensors”, *Journal of American Chemical Society*, 138, 13431–13437, 2016.
- [4] M. Horprathum, et al., “Ultrasensitive hydrogen sensor based on Pt-decorated WO<sub>3</sub> nanorods prepared by glancing-angle dc magnetron sputtering”, *ACS Applied Materials and Interfaces*, 6, 22051–22060, 2014.
- [5] O. Alev, et al., “Effect of Pt catalyst on the sensor performance of WO<sub>3</sub> nanoflakes towards hazardous gases”, *Journal of Alloys and Compounds*, 32, 25376–25384, 2021.
- [6] P.M. Bulemo, et al., “Controlled synthesis of electrospun hollow Pt-loaded SnO<sub>2</sub> microbelts for acetone sensing”, *Sensors and Actuators B: Chemical*, 344, 130208, 2021.
- [7] C. Dong, et al., “Combustion synthesis of porous Pt-functionalized SnO<sub>2</sub> sheets for isopropanol gas detection with a significant enhancement in response”, *Journal of Materials and Chemistry A*, 2, 20089–20095, 2014.
- [8] P.M. Bulemo, et al., “Facile Synthesis of Pt-Functionalized Meso/Macroporous SnO<sub>2</sub> Hollow Spheres through in Situ Templating with SiO<sub>2</sub> for H<sub>2</sub>S Sensors”, *ACS Applied Materials and Interfaces*, 10, 18183-18191, 2018.
- [9] W. Guo, et al., “High-response H<sub>2</sub>S sensor based on ZnO/SnO<sub>2</sub> heterogeneous nanospheres”, *RSC Advances*, 6, 15048-15053, 2016.
- [10] P.S. Kolhe, et al., “Synthesis of Ag doped SnO<sub>2</sub> thin films for the evaluation of H<sub>2</sub>S gas sensing properties”, *Physica B*, 524, 90-96, 2017.
- [11] H. Zou, et al., “An Au/SnO–SnO<sub>2</sub> nanosheet based composite used for rapid detection of hydrogen sulfide”, *Analytical Methods*, 15, 1315-1322, 2023.
- [12] L. Liu, et al., “In Situ Growth of NiO@SnO<sub>2</sub> Hierarchical Nanostructures for High Performance H<sub>2</sub>S Sensing”, *ACS Applied Materials and Interfaces*, 11, 44829-44836, 2019.
